# Supplementary material for: Selecting a climate model subset to optimise key ensemble properties
Source: Copernicus journal article supplement (doi:10.5194/esd-2017-28), 2017-04-03
Supplement: Supplementary file 1 [file esd-2017-28-supplement.pdf]

# Supplement of: Selecting a climate model subset to optimise key ensemble properties

Nadja Herger<sup>1</sup>, Gab Abramowitz<sup>1</sup>, Reto Knutti<sup>2,3</sup>, Oliver Angélil<sup>1</sup>, Karsten Lehmann<sup>4</sup>, and Benjamin M. Sanderson<sup>3</sup>

<sup>1</sup>Climate Change Research Centre and ARC Centre of Excellence for Climate System Science, UNSW Sydney, Sydney NSW 2052, Australia

<sup>2</sup>Institute for Atmospheric and Climate Science, ETH Zurich, Zurich, Switzerland

<sup>3</sup>National Center for Atmospheric Research, Boulder, Colorado, USA

<sup>4</sup>Satalia, Berlin, Germany

*Correspondence to:* Nadja Herger (nadja.herger@student.unsw.edu.au)

## Contents

|          |                                                             |          |
|----------|-------------------------------------------------------------|----------|
| <b>1</b> | <b>CMIP5 model runs used in this study</b>                  | <b>2</b> |
| <b>2</b> | <b>Gridded observational products</b>                       | <b>3</b> |
| <b>3</b> | <b>Ensemble size vs. RMSE</b>                               | <b>4</b> |
| 5        | 3.1 For all available runs . . . . .                        | 4        |
|          | 3.2 For 1 run per institute . . . . .                       | 6        |
| <b>4</b> | <b>Performance vs. independence for 1 run per institute</b> | <b>7</b> |
| <b>5</b> | <b>Global mean temperature trends</b>                       | <b>8</b> |
| <b>6</b> | <b>Results of the model-as-truth experiments</b>            | <b>9</b> |

# 1 CMIP5 model runs used in this study

**Table S1.** The CMIP5 model runs used in this study.

| Institute ID | Modeling Center (or Group)                                                                                                                                                       | Model Name     | Ensemble Member                                                                 |
|--------------|----------------------------------------------------------------------------------------------------------------------------------------------------------------------------------|----------------|---------------------------------------------------------------------------------|
| CSIRO-BOM    | Commonwealth Scientific and Industrial Research Organization (CSIRO) and Bureau of Meteorology (BOM), Australia                                                                  | ACCESS1.0      | r1i1p1                                                                          |
|              |                                                                                                                                                                                  | ACCESS1.3      | r1i1p1                                                                          |
| BCC          | Beijing Climate Center, China Meteorological Administration                                                                                                                      | BCC-CSM1.1-m   | r1i1p1                                                                          |
|              |                                                                                                                                                                                  | BCC-CSM1.1     | r1i1p1                                                                          |
| GCESS        | College of Global Change and Earth System Science, Beijing Normal University                                                                                                     | BNU-ESM        | r1i1p1                                                                          |
| NCAR         | National Center for Atmospheric Research, USA                                                                                                                                    | CCSM4          | r1i1p1, r2i1p1, r3i1p1, r4i1p1, r5i1p1, r6i1p1                                  |
| NSF-DOE-NCAR | National Science Foundation, Department of Energy, NCAR, USA                                                                                                                     | CESM-BGC       | r1i1p1                                                                          |
|              |                                                                                                                                                                                  | CESM1-CAM5     | r1i1p1, r2i1p1, r3i1p1                                                          |
| CMCC         | Centro Euro-Mediterraneo per I Cambiamenti Climatic, Italy                                                                                                                       | CMCC-CMS       | r1i1p1                                                                          |
|              |                                                                                                                                                                                  | CMCC-CM        | r1i1p1                                                                          |
| CNRM-CERFACS | Centre National de Recherches Météorologiques / Centre Européen de Recherche et Formation Avancée en Calcul Scientifique, France                                                 | CNRM-CM5       | r1i1p1                                                                          |
| CSIRO-QCCCE  | Commonwealth Scientific and Industrial Research Organization in collaboration with Queensland Climate Change Centre of Excellence, Australia                                     | CSIRO-Mk3.6.0  | r1i1p1, r2i1p1, r3i1p1, r4i1p1, r5i1p1, r6i1p1, r7i1p1, r8i1p1, r9i1p1, r10i1p1 |
| CCCMA        | Canadian Centre for Climate Modelling and Analysis, Canada                                                                                                                       | CanESM2        | r1i1p1, r2i1p1, r3i1p1, r4i1p1, r5i1p1                                          |
| EC-EARTH     | EC-EARTH consortium                                                                                                                                                              | EC-EARTH       | r2i1p1, r8i1p1, r9i1p1, r12i1p1                                                 |
| LASG-CESS    | LASG, Institute of Atmospheric Physics, Chinese Academy of Sciences, China                                                                                                       | FGOALS-g2      | r1i1p1                                                                          |
| FIO          | The First Institute of Oceanography, SOA, China                                                                                                                                  | FIO-ESM        | r1i1p1, r2i1p1, r3i1p1                                                          |
| NOAA GFDL    | NOAA Geophysical Fluid Dynamics Laboratory, USA                                                                                                                                  | GFDL-CM3       | r1i1p1                                                                          |
|              |                                                                                                                                                                                  | GFDL-ESM2G     | r1i1p1                                                                          |
|              |                                                                                                                                                                                  | GFDL-ESM2M     | r1i1p1                                                                          |
| NASA GISS    | NASA Goddard Institute for Space Studies, USA                                                                                                                                    | GISS-E2-H-CC   | r1i1p1                                                                          |
|              |                                                                                                                                                                                  | GISS-E2-H      | r1i1p1, r1i1p2, r1i1p3, r2i1p1, r2i1p3                                          |
|              |                                                                                                                                                                                  | GISS-E2-R-CC   | r1i1p1                                                                          |
|              |                                                                                                                                                                                  | GISS-E2-R      | r1i1p1, r1i1p2, r1i1p3, r2i1p1, r2i1p3                                          |
| NIMR/KMA     | National Institute of Meteorological Research/ Korea Meteorological Administration, Korea                                                                                        | HadGEM2-AO     | r1i1p1                                                                          |
| MOHC         | Met Office Hadley Centre, UK                                                                                                                                                     | HadGEM2-CC     | r1i1p1                                                                          |
|              |                                                                                                                                                                                  | HadGEM2-ES     | r1i1p1, r2i1p1, r3i1p1, r4i1p1                                                  |
| INM          | Institute for Numerical Mathematics, Russia                                                                                                                                      | INM-CM4        | r1i1p1                                                                          |
| IPSL         | Institut Pierre-Simon Laplace, France                                                                                                                                            | IPSL-CM5A-LR   | r1i1p1, r2i1p1, r3i1p1, r4i1p1                                                  |
|              |                                                                                                                                                                                  | IPSL-CM5A-MR   | r1i1p1                                                                          |
|              |                                                                                                                                                                                  | IPSL-CM5B-LR   | r1i1p1                                                                          |
| MIROC        | Japan Agency for Marine-Earth Science and Technology, Atmosphere and Ocean Research Institute (The University of Tokyo), and National Institute for Environmental Studies, Japan | MIROC-ESM-CHEM | r1i1p1                                                                          |
|              |                                                                                                                                                                                  | MIROC-ESM      | r1i1p1                                                                          |
|              |                                                                                                                                                                                  | MIROC5         | r1i1p1, r2i1p1, r3i1p1                                                          |
| MPI-M        | Max Planck Institute for Meteorology, Germany                                                                                                                                    | MPI-ESM-LR     | r1i1p1, r2i1p1, r3i1p1                                                          |
|              |                                                                                                                                                                                  | MPI-ESM-MR     | r1i1p1                                                                          |
| MRI          | Meteorological Research Institute, Japan                                                                                                                                         | MRI-CGCM3      | r1i1p1                                                                          |
| NCC          | Norwegian Climate Centre                                                                                                                                                         | NorESM1-ME     | r1i1p1                                                                          |
|              |                                                                                                                                                                                  | NorESM1-M      | r1i1p1                                                                          |

## 2 Gridded observational products

**Table S2.** Information about the observational and reanalysis products used in this study. tas: Surface air temperature, pr: Total precipitation. The overlapping period 1956–2013 was used for all the products. If two resolutions are given, then the first refers to the resolution the product comes in and the second resolution is the one it is regridded to.

| Product Name   | Variable | Coverage                 | Resolution  | Link                                                                                                                              | References                                                                                                                                                                                                                                                                                                                                                                                                                                                                                                                                                                                                                                                                                                                                                   |
|----------------|----------|--------------------------|-------------|-----------------------------------------------------------------------------------------------------------------------------------|--------------------------------------------------------------------------------------------------------------------------------------------------------------------------------------------------------------------------------------------------------------------------------------------------------------------------------------------------------------------------------------------------------------------------------------------------------------------------------------------------------------------------------------------------------------------------------------------------------------------------------------------------------------------------------------------------------------------------------------------------------------|
| CRUTEM4        | tas      | land-only                | 5°          | <a href="http://www.metoffice.gov.uk/hadobs/crutem4/index.html">http://www.metoffice.gov.uk/hadobs/crutem4/index.html</a>         | Jones, P. D., Lister, D. H., Osborn, T. J., Harpham, C., Salmon, M., and Morice, C. P.: Hemispheric and large-scale land-surface air temperature variations: An extensive revision and an update to 2010, <i>J. Geophys. Res. Atmos.</i> , 117(D5), doi:10.1029/2011JD017139, 2012.                                                                                                                                                                                                                                                                                                                                                                                                                                                                          |
| Berkeley BEST  | tas      | land-only and land+ocean | 1° / 2.5°   | <a href="http://berkeleyearth.org/data/">http://berkeleyearth.org/data/</a>                                                       | Rohde R., Muller, R. A., Jacobsen, R., Muller, E., Perlmutter, S., Rosenfeld, A., Wurtele, J., Groom, D., and Wickham, C.: A New Estimate of the Average Earth Surface Land Temperature Spanning 1753 to 2011, <i>Geoinformatics and Geostatistics: An Overview</i> , 1(1), doi:10.4172/2327-4581.1000101, 2013.<br>Rohde, R., Muller, R., Jacobsen, R., Perlmutter, S., Rosenfeld, A., Wurtele, J., Curry, J., Wickham, C., and Mosher, S.: Berkeley Earth Temperature Averaging Process, <i>Geoinformatics and Geostatistics: An Overview</i> , 1(2), doi:10.4172/2327-4581.1000103, 2013.<br>Levi, B. G.: Earth's land surface temperature trends: A new approach confirms previous results, <i>Phys. Today</i> , 66(4), 17, doi:10.1063/PT.3.1936, 2013. |
| CRU TS (v3.23) | tas, pr  | land-only                | 0.5° / 2.5° | <a href="https://crudata.uea.ac.uk/cru/data/hrg/cru_ts_3.23/">https://crudata.uea.ac.uk/cru/data/hrg/cru_ts_3.23/</a>             | Harris, I., Jones, P. D., Osborn, T. J. and Lister, D. H.: Updated high-resolution grids of monthly climatic observations — the CRU TS3.10 Dataset, <i>Int. J. Climatol.</i> , 34(3), 623–642, doi:10.1002/joc.3711, 2014.                                                                                                                                                                                                                                                                                                                                                                                                                                                                                                                                   |
| HadCRUT4       | tas      | land+ocean               | 5°          | <a href="http://www.metoffice.gov.uk/hadobs/hadcrut4/">http://www.metoffice.gov.uk/hadobs/hadcrut4/</a>                           | Morice, C. P., Kennedy, J. J., Rayner, N. A., and Jones, P. D.: Quantifying uncertainties in global and regional temperature change using an ensemble of observational estimates: The HadCRUT4 dataset, <i>J. Geophys. Res. Atmos.</i> , 117(D8), doi:10.1029/2011JD017187, 2012.                                                                                                                                                                                                                                                                                                                                                                                                                                                                            |
| GPCC (v7)      | pr       | land-only                | 2.5°        | <a href="http://www.esrl.noaa.gov/psd/data/gridded/data.gpcc.html">http://www.esrl.noaa.gov/psd/data/gridded/data.gpcc.html</a>   | Schneider, U., Becker, A., Finger, P., Meyer-Christoffer, A., Rudolf, B., and Ziese, M.: GPCC Full Data Reanalysis Version 7.0 at 2.5°: Monthly Land-Surface Precipitation from Rain-Gauges built on GTS-based and Historic Data, doi: 10.5676/DWD GPCC/FD_M_V7_250, 2015.                                                                                                                                                                                                                                                                                                                                                                                                                                                                                   |
| PREC/L         | pr       | land-only                | 2.5°        | <a href="http://www.esrl.noaa.gov/psd/data/gridded/data.precl.html">http://www.esrl.noaa.gov/psd/data/gridded/data.precl.html</a> | Chen, M., Xie, P., Janowiak, J. E., and Arkin, P. A.: Global land precipitation: A 50-yr monthly analysis based on gauge observations, <i>J. Hydrometeorol.</i> , 3(3), 249–266, doi:0.1175/1525-7541(2002)003<0249:GLPAYM>2.0.CO;2, 2002.                                                                                                                                                                                                                                                                                                                                                                                                                                                                                                                   |

### 3 Ensemble size vs. RMSE

#### 3.1 For all available runs

##### a - CRUTEM4

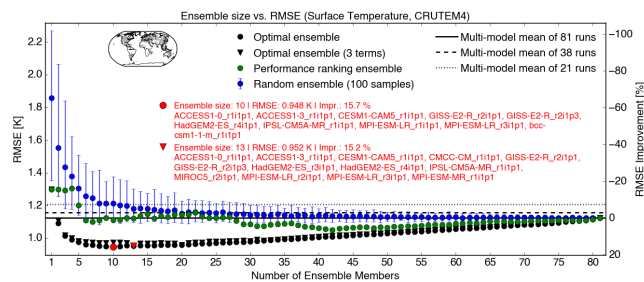

##### b - Berkeley BEST, land

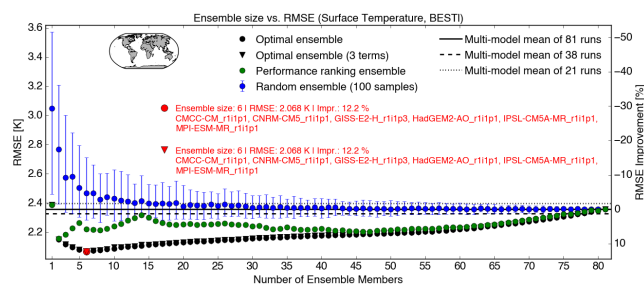

##### c - HadCRUT4

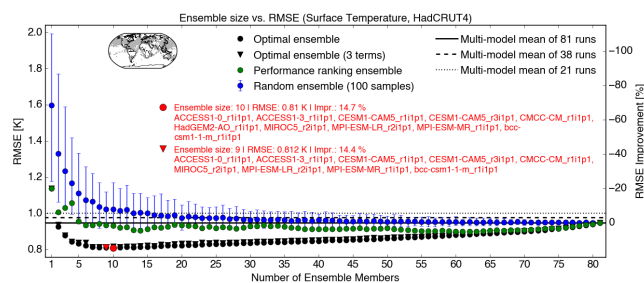

##### d - Berkeley BEST, global

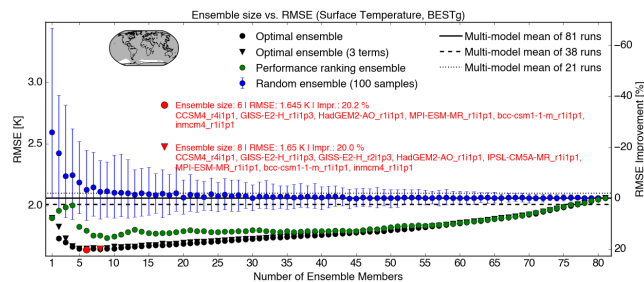

Figure S1. Same as Figure 1 (a) but for different observational products.

**a - GPCC7**

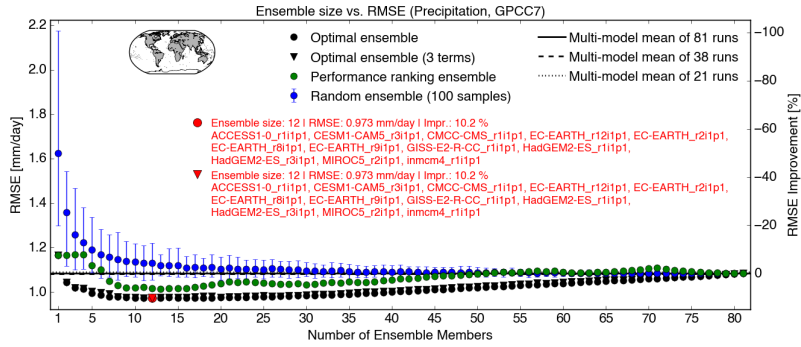

**b - PREC/L**

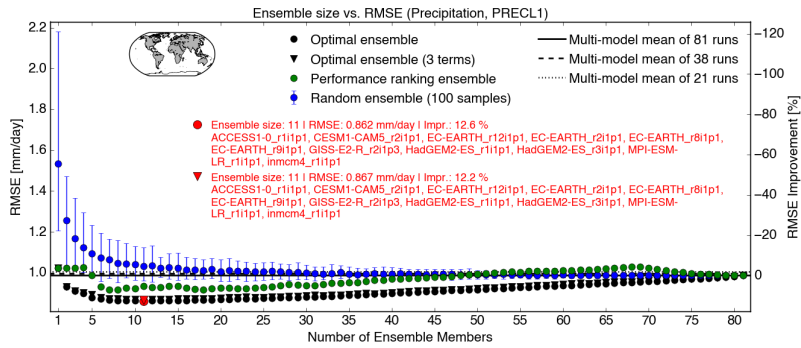

**Figure S2.** Same as Figure 1 (b) but for different observational products.

### 3.2 For 1 run per institute

#### a - Surface Air Temperature

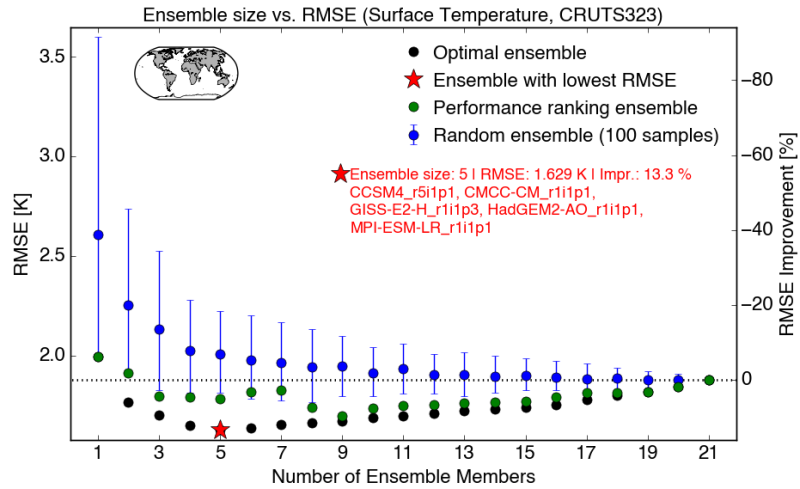

#### b - Total Precipitation

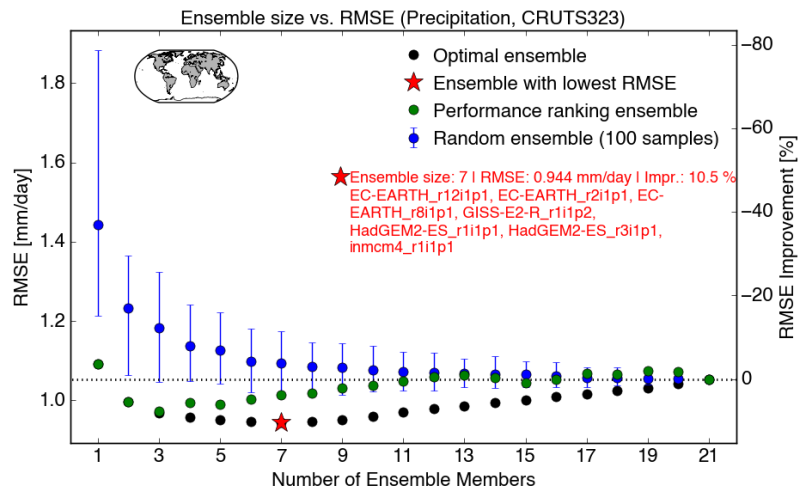

**Figure S3.** Same as Figure 1 but for 21 model simulations (one simulation per institute to manually remove obvious duplicates) instead of all available model simulations. The horizontal dotted line refers to the multi-model mean of 21 simulations.

#### 4 Performance vs. independence for 1 run per institute

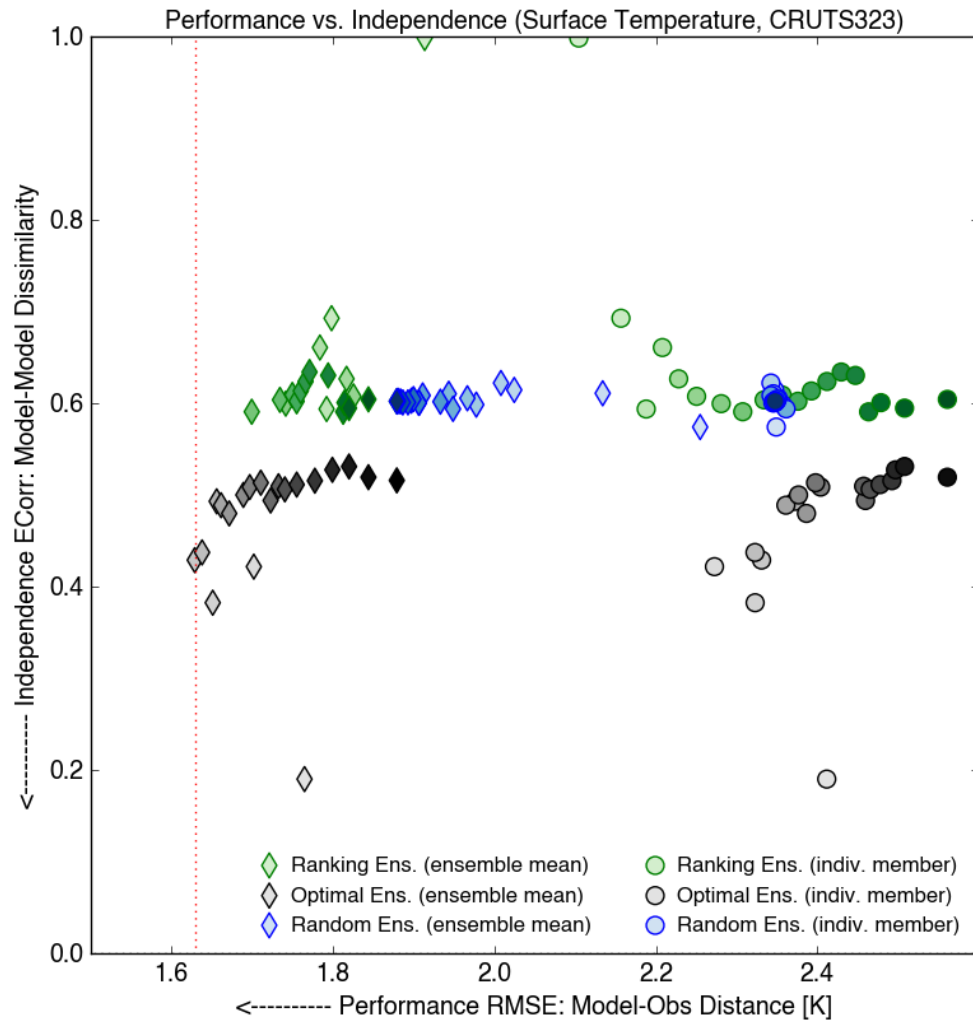

**Figure S4.** Same as Figure 2 but for one model run per institute.

## 5 Global mean temperature trends

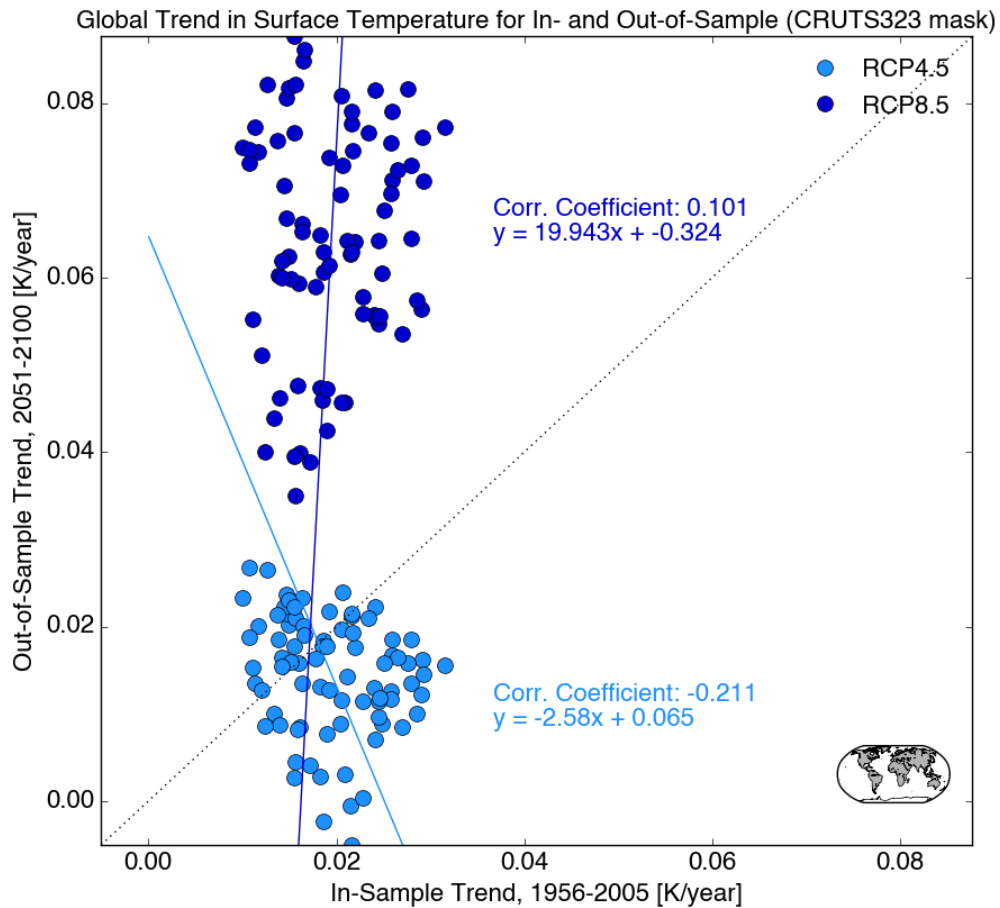

**Figure S5.** For each of the 81 model simulations, the linear trends in 1956–2005 and 2051–2100 were calculated and plotted against each other. This was done separately for RCP4.5 (light blue) and RCP8.5 (dark blue). The correlation coefficients and regression equations are given on the plot. The trend was calculated based on the data availability of CRUTS3.23 (small map in bottom right corner).



## 6 Results of the model-as-truth experiments

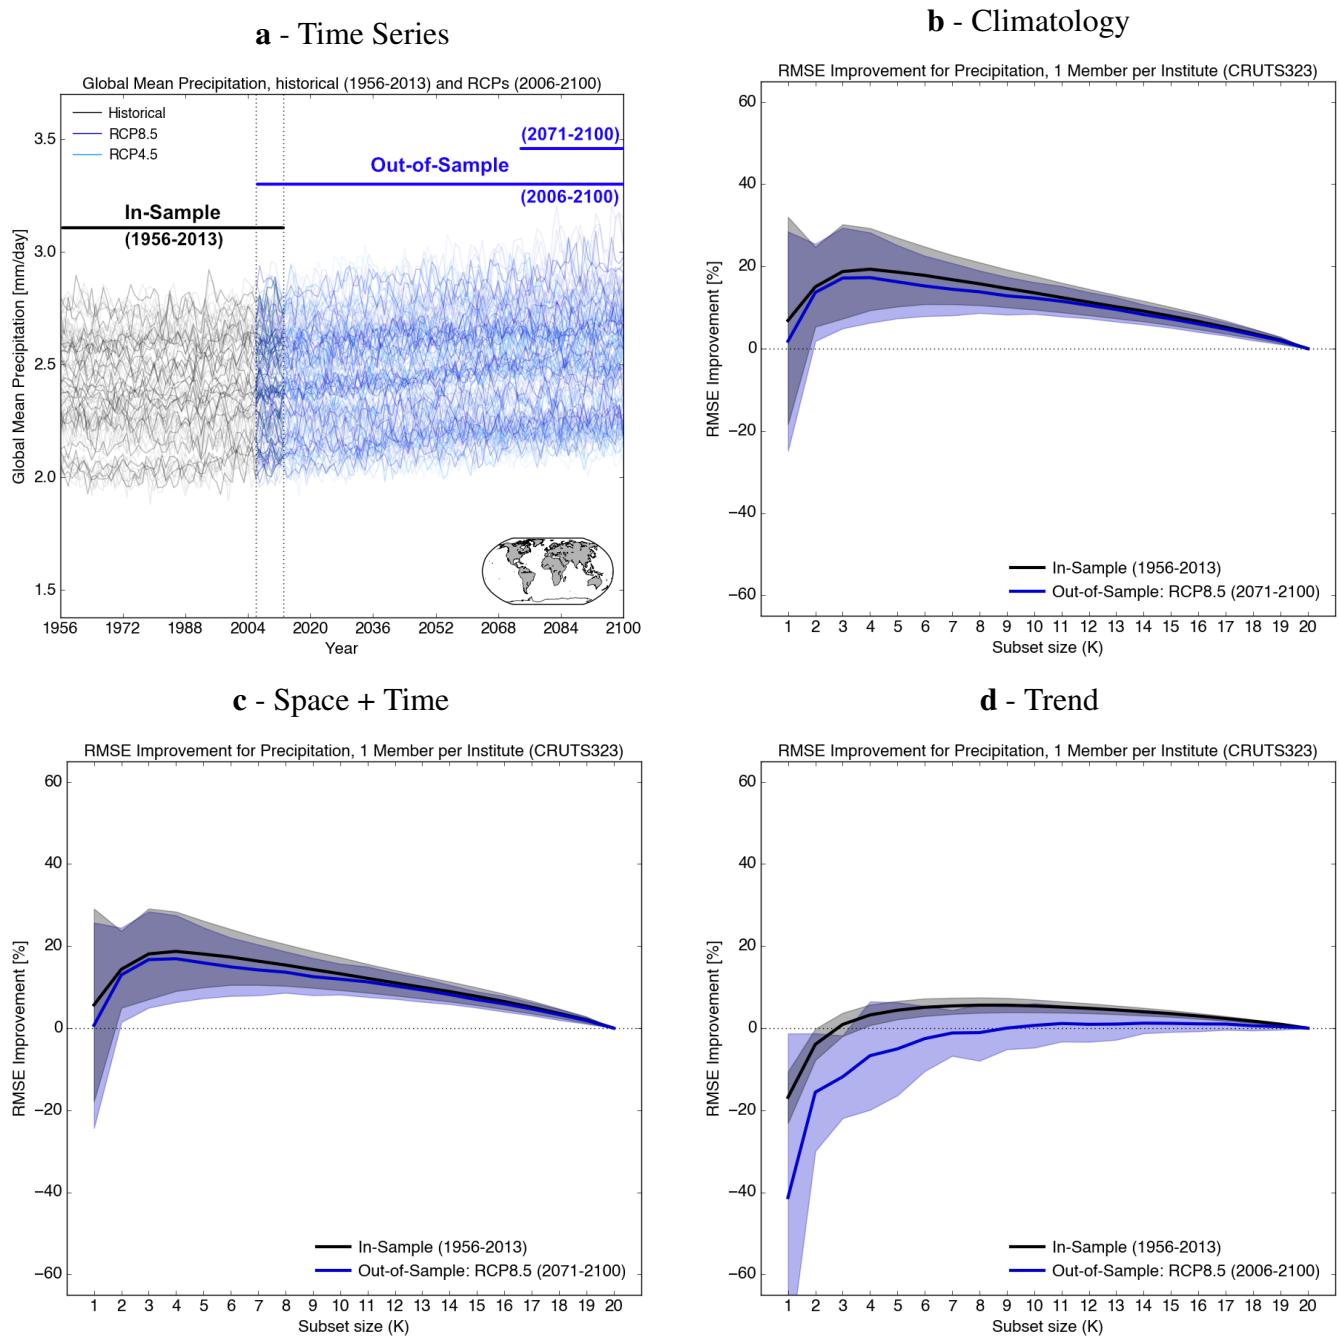

**Figure S6.** Same as Figure 4 but for precipitation.

### a - Time Series

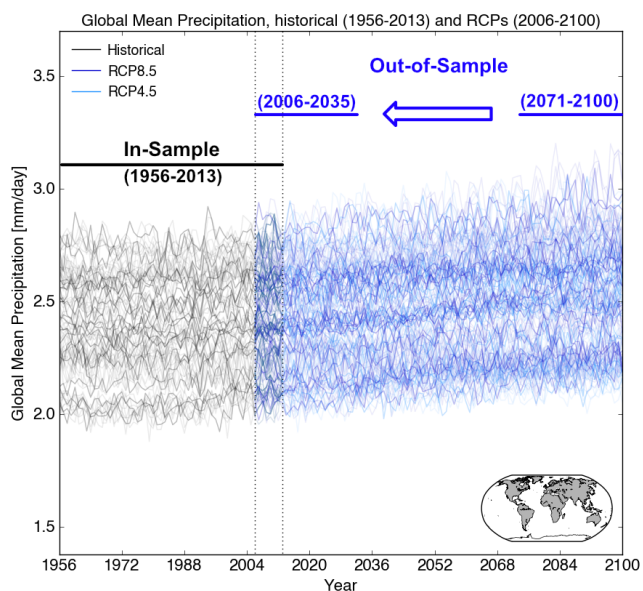

### b - Climatology

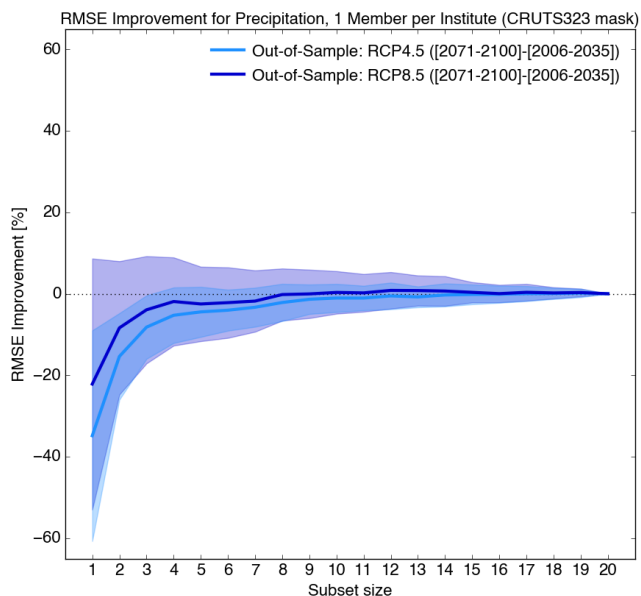

### c - Space + Time

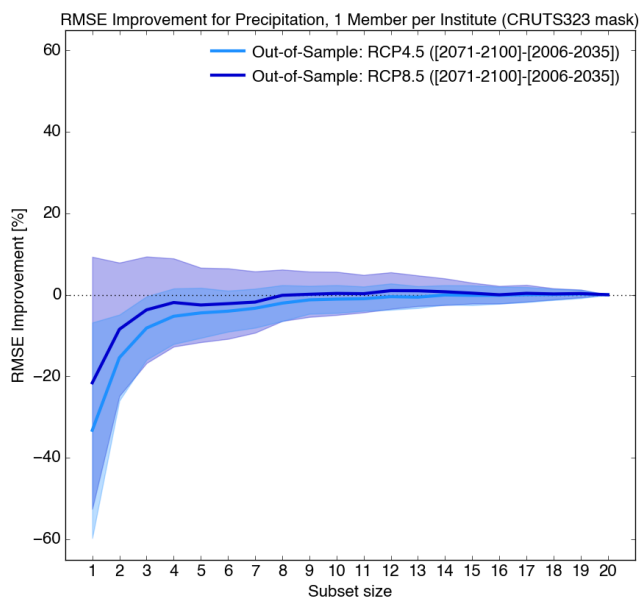

### d - Trend

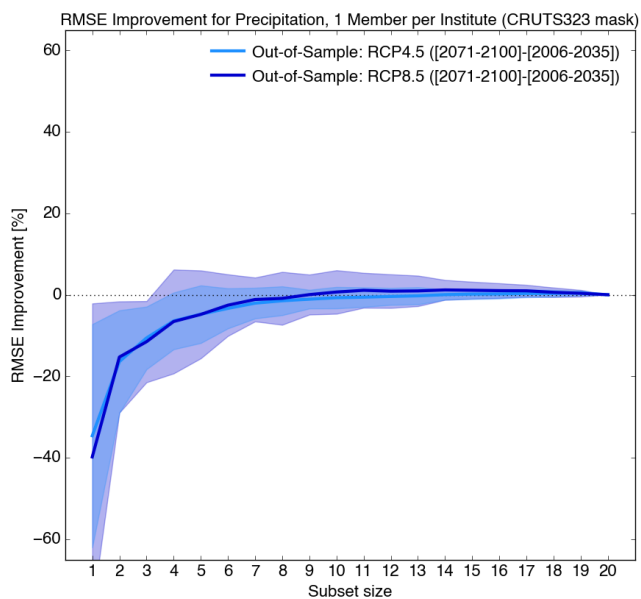

Figure S7. Same as Figure 6 but for precipitation.

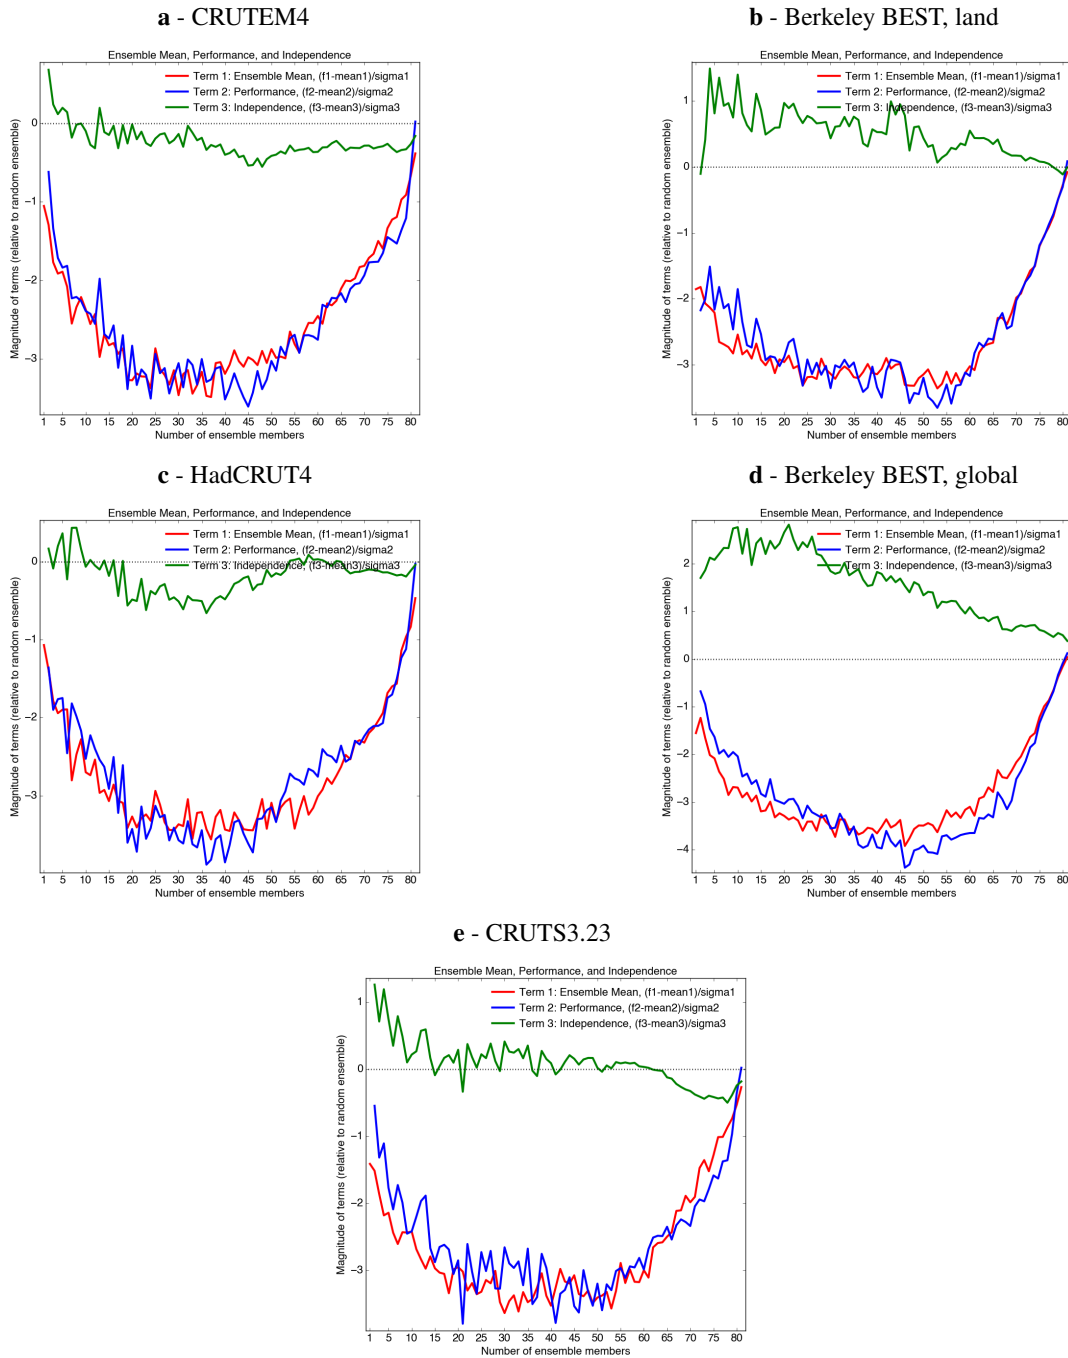

**Figure S8.** Magnitude of the three terms of the objective function in equation (2). The results for five different observational products of surface air temperature is shown. The meaning of the terms is described in section 4.1.

**a - GPCC7**

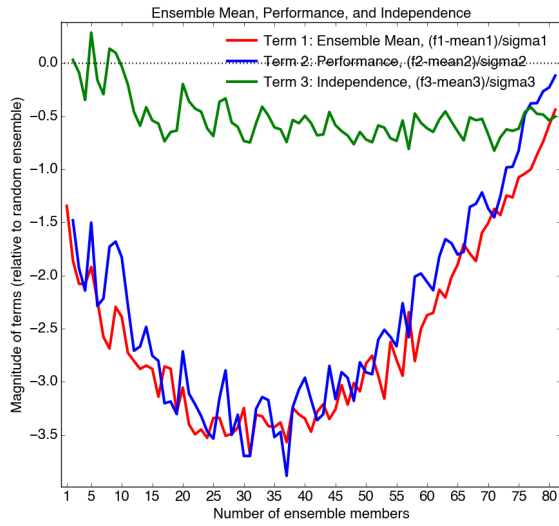

**b - PREC/L**

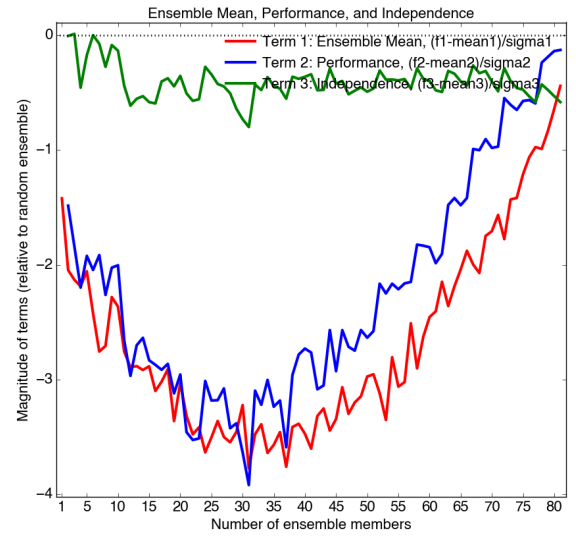

**c - CRUTS3.23**

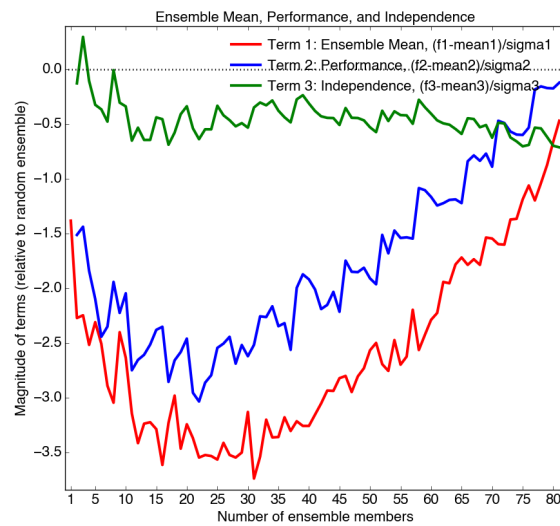

**Figure S9.** Same as Figure S8, but for total precipitation.
